# Supplementary material for: Developmental Vitamin D Deficiency in the Rat Impairs Recognition Memory, but Has No Effect on Social Approach or Hedonia
Source: MDPI journal article supplement (doi:10.3390/nu11112713), 2019-11-08
Supplement: s1 [file s1]

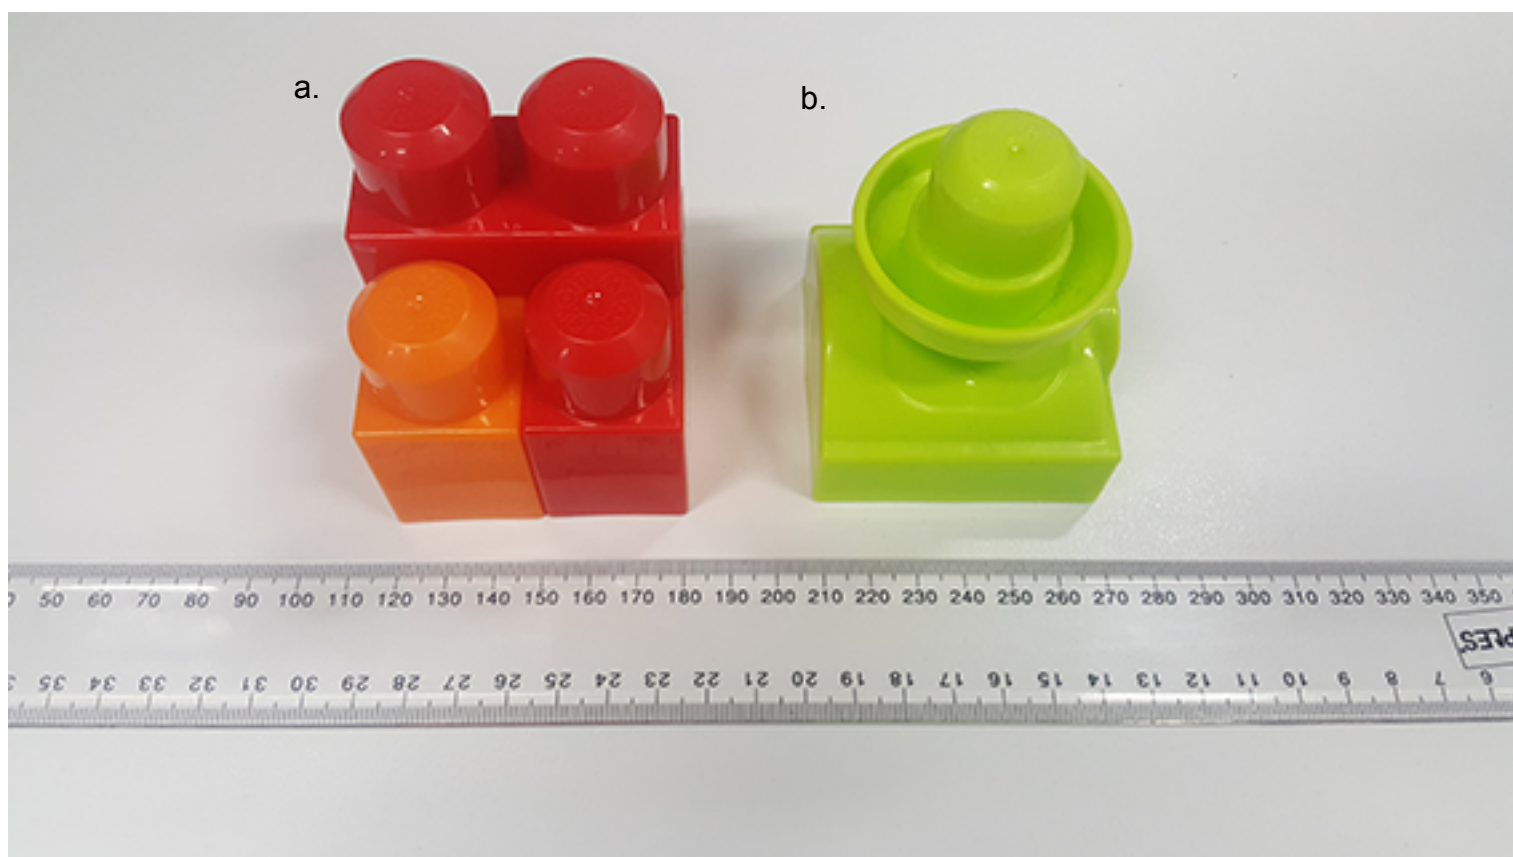

**Figure S1.** Objects used in the NORT test. a. The familiar object (NB: two of these objects were used for familiarisation). b) The novel object.
