# Supplementary figures and images for: Developmental Vitamin D Deficiency in the Rat Impairs Recognition Memory, but Has No Effect on Social Approach or Hedonia
Source: MDPI journal article supplement (doi:10.3390/nu11112713), 2019-11-08

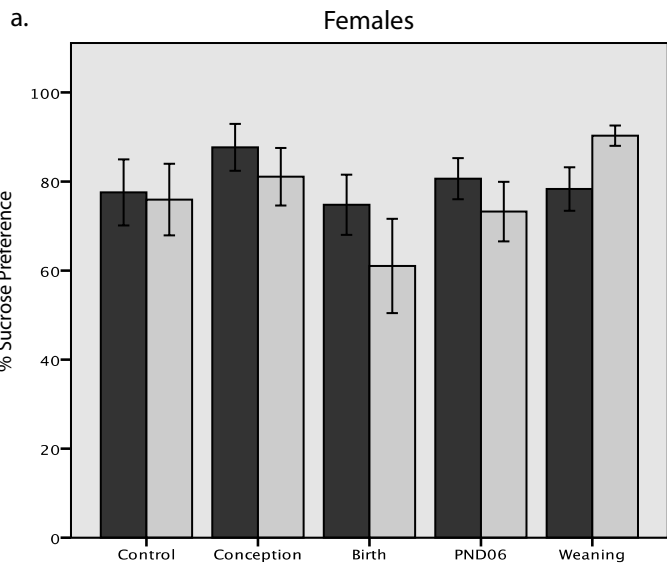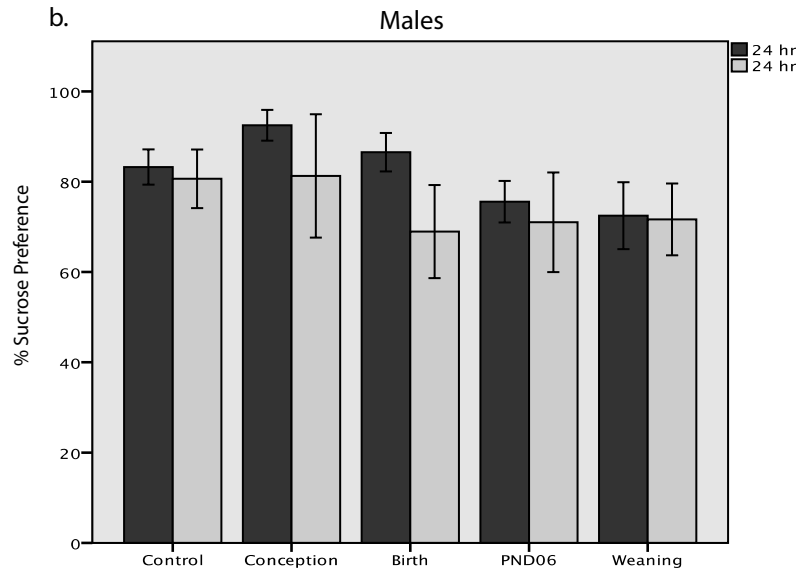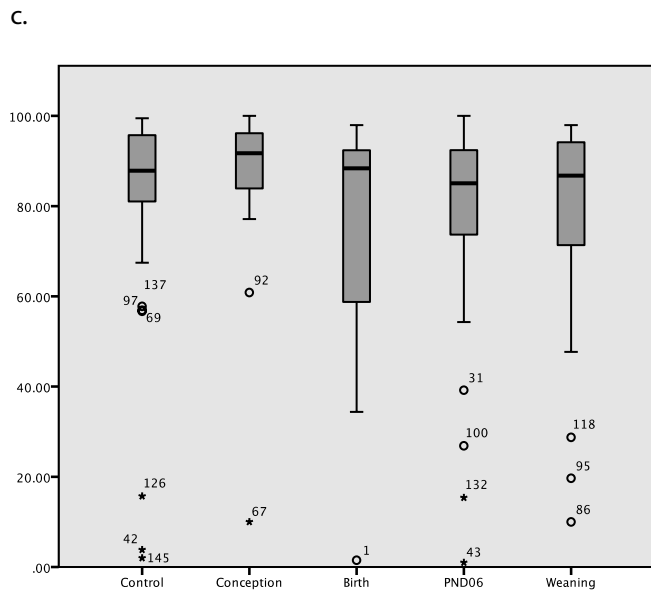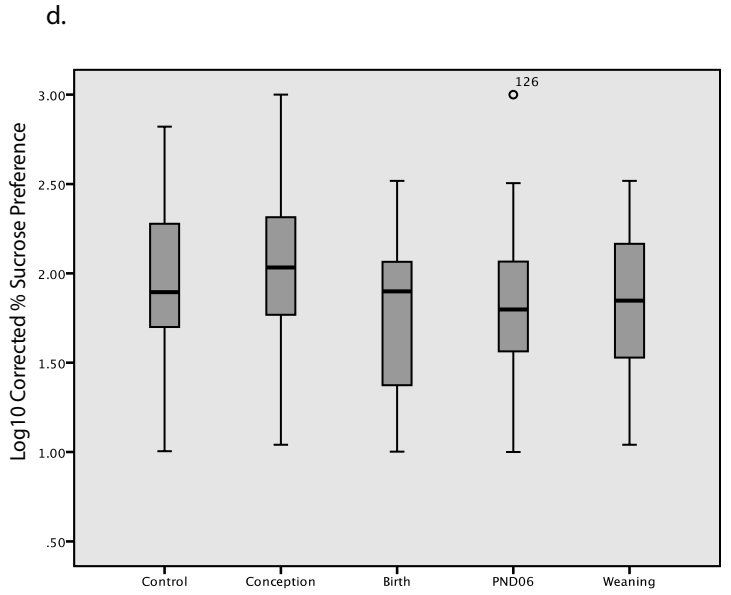

Supplement: s1 [file s1]
